# Supplementary material for: Influence of external contextual factors on the implementation of health and social care interventions into practice within or across countries—a protocol for a ‘best fit’ framework synthesis
Source: Springer Nature journal article supplement (doi:10.1186/s13643-019-1180-8), 2019-11-04
Supplement: MOESM2 [file 17347840]

## Additional File 2

### Search strategy - Framework review (review stage 1) - MEDLINE (OVID)

1. translational medical research.sh
2. evidence based practice.sh
3. diffusion of innovation.sh
4. knowledge utili\*.ab,ti
5. knowledge mobili\*.ab,ti
6. knowledge transfer\*.ab,ti
7. knowledge translat\*.ab,ti
8. implement\*.ab,ti
9. adopt\*.ab,ti
10. research utili\*.ab,ti
11. spread\*.ab,ti
12. scale-up.ab,ti
13. scaling-up.ab,ti
  
14. external context\*.ab,ti
15. external environment\*.ab,ti
16. outer context\*.ab,ti
17. outer setting\*.ab,ti
18. structural context\*.ab,ti
19. structural environment\*.ab,ti
20. wider context\*.ab,ti
21. wider environment\*.ab,ti
22. wider setting\*.ab,ti
23. broader context\*.ab,ti
24. broader environment\*.ab,ti
25. macro-level.ab,ti
26. micro-level.ab,ti
27. system-level.ab,ti
28. local context\*.ab,ti
29. local environment\*.ab,ti
30. regional context\*.ab,ti
31. regional environment\*.ab,ti
32. national context\*.ab,ti
33. national environment\*.ab,ti
  
34. framework\*.ab,ti
35. concept\*.ab,ti
36. theor\*.ab,ti
37. model\*.ab,ti
  
38. 1 or 2 or 3 or 4 or 5 or 6 or 7 or 8 or 9 or 10 or 11 or 12 or 13
  
39. 14 or 15 or 16 or 17 or 18 or 19 or 20 or 21 or 22 or 23 or 24 or 25 or 26 or 27 or 28  
or 29 or 30 or 31 or 32 or 33
  
40. 34 or 35 or 36 or 37
  
41. 38 and 39 and 40
